# Supplementary material
Source: ML conference proceedings conference paper supplement (https://proceedings.neurips.cc/paper_files/paper/2018/hash/8d9766a69b764fefc12f56739424d136-Abstract.html)
Supplement: Supplementary file [file 8d9766a69b764fefc12f56739424d136-Supplemental.zip]

# 1 Appendix

## 1.1 Update in M-step

For  $\mu$ , we choose the gradient ascent method. The gradient of  $\mu_j^t$  for one rating point  $y_{ij}^t$  is:

$$\frac{\partial L}{\partial \mu_j^t} = (1 - y_{ij}^t) \frac{Q_{ij} - 1}{\mu_j^t(Q_{ij} - 1) + 1} + y_{ij}^t \frac{1}{\mu_j^t} + \frac{a^t - 1}{\mu_j^t} - \frac{b^t - 1}{1 - \mu_j^t}, \quad (1)$$

where  $Q_{ij} = \frac{\mathcal{N}(0|U_i^T V_j, \lambda_y^{-1})}{\mathcal{N}(0|U_i^T V_j, \lambda_y^{-1}) + \mathcal{N}(1|U_i^T V_j, \lambda_y^{-1})}$ . This process is repeated until convergence. For  $U$  and  $V$ , we set their derivatives to zero and get the following update formulas:

$$U_i \leftarrow (\lambda_y \sum_j \bar{\alpha}_{ij} V_j V_j^T + \lambda_V I_K)^{-1} (\sum_j \lambda_y \bar{\alpha}_{ij} y_{ij}^t V_j), \quad (2)$$

$$V_j \leftarrow (\lambda_y \sum_i \bar{\alpha}_{ij} U_i U_i^T + \lambda_U I_K)^{-1} (\sum_i \lambda_y \bar{\alpha}_{ij} y_{ij}^t U_i), \quad (3)$$

where

$$\bar{\alpha}_{ij} = \frac{\bar{\mu}_{ij} \mathcal{N}(0|U_i^T V_j, \lambda_y^{-1})}{\bar{\mu}_{ij} \mathcal{N}(0|U_i^T V_j, \lambda_y^{-1}) + 1 - \bar{\mu}_{ij}}, \quad (4)$$

$$\bar{\mu}_{ij} = \begin{cases} \mu_{ij}^t, & \text{if } y_{ij}^t = 1 \\ \sum_{d=1}^D \mu_j^d / D, & \text{otherwise} \end{cases}$$

When  $y_{ij}^t$  is not rated ( $y_{ij}^t = 0$ ), the  $\bar{\mu}_{ij}$  is set as the average of all possible  $\mu_j^d$ .

## 1.2 Recommendation Overlaps

Below we show the recommendation overlaps when  $D = 4$  and  $D = 5$ .

| Recommendation Overlaps of Different User Intents |                |                   |       |                   |              |                   |       |                   |        |                   |       |                   |
|---------------------------------------------------|----------------|-------------------|-------|-------------------|--------------|-------------------|-------|-------------------|--------|-------------------|-------|-------------------|
| Dataset                                           | Movielens-100K |                   |       |                   | Movielens-1M |                   |       |                   | LastFM |                   |       |                   |
| User Intent                                       | $D=4$          |                   | $D=5$ |                   | $D=4$        |                   | $D=5$ |                   | $D=4$  |                   | $D=5$ |                   |
|                                                   | H4MF           | H4MF <sub>c</sub> | H4MF  | H4MF <sub>c</sub> | H4MF         | H4MF <sub>c</sub> | H4MF  | H4MF <sub>c</sub> | H4MF   | H4MF <sub>c</sub> | H4MF  | H4MF <sub>c</sub> |
| U1 vs U2                                          | 78%            | 22%               | 74%   | 10%               | 86%          | 10%               | 86%   | 0%                | 30%    | 4%                | 30%   | 0%                |
| U1 vs U3                                          | 72%            | 44%               | 64%   | 10%               | 84%          | 0%                | 84%   | 0%                | 44%    | 10%               | 38%   | 0%                |
| U1 vs U4                                          | 70%            | 18%               | 66%   | 0%                | 86%          | 8%                | 86%   | 0%                | 28%    | 2%                | 32%   | 4%                |
| U2 vs U3                                          | 66%            | 24%               | 66%   | 20%               | 90%          | 0%                | 82%   | 0%                | 46%    | 6%                | 28%   | 6%                |
| U2 vs U4                                          | 72%            | 16%               | 72%   | 0%                | 90%          | 16%               | 88%   | 8%                | 48%    | 10%               | 24%   | 2%                |
| U3 vs U4                                          | 70%            | 16%               | 64%   | 0%                | 84%          | 0%                | 92%   | 2%                | 32%    | 2%                | 30%   | 0%                |
| U1 vs U5                                          | -              | -                 | 70%   | 0%                | -            | -                 | 90%   | 4%                | -      | -                 | 26%   | 2%                |
| U2 vs U5                                          | -              | -                 | 72%   | 0%                | -            | -                 | 88%   | 4%                | -      | -                 | 32%   | 10%               |
| U3 vs U5                                          | -              | -                 | 78%   | 0%                | -            | -                 | 84%   | 2%                | -      | -                 | 26%   | 2%                |
| U4 vs U5                                          | -              | -                 | 66%   | 0%                | -            | -                 | 84%   | 0%                | -      | -                 | 28%   | 8%                |

Table 1: Recommendation overlaps of different user intents on three datasets when  $D = 4$  and  $D = 5$ .  $U1$ ,  $U2$ ,  $U3$ ,  $U4$ , and  $U5$  indicate the indices of user intents.

### 1.3 Experimental Runtime Results

Below we show the experimental runtime results of H4MF<sub>c</sub>. We implement the model with Python and our machine settings are listed as follows: Ubuntu 16.04.4 LTS, Intel(R) Xeon(R) CPU E5-2640 v4 @ 2.40GHz, and 12GB 2600 MHz memory. We can see that the runtime is heavily influenced by the state number and the length of the data sequence. When  $D$  increases, the runtime increases dramatically. As expected, *Movielens-1M* costs much more time than *Movielens-100K* because users in *Movielens-1M* have longer length of the data sequence.

| Experimental Runtime Results (In Seconds) |                |                 |                |
|-------------------------------------------|----------------|-----------------|----------------|
| State number                              | MovieLens-100K | MovieLens-1M    | LastFM         |
| D=1                                       | 1102 $\pm$ 5   | 23359 $\pm$ 100 | 13639 $\pm$ 34 |
| D=2                                       | 2442 $\pm$ 23  | 36350 $\pm$ 134 | 18268 $\pm$ 41 |
| D=3                                       | 3239 $\pm$ 40  | 42461 $\pm$ 200 | 24694 $\pm$ 45 |
| D=4                                       | 4856 $\pm$ 54  | 54461 $\pm$ 389 | 29545 $\pm$ 50 |

Table 2: Runtime results of H4MF<sub>c</sub>.

### 1.4 Notation

| Symbol                                           | Description                                                         |
|--------------------------------------------------|---------------------------------------------------------------------|
| $y_i^t$                                          | The item that user $i$ rated at time $t$                            |
| $\alpha_{ij}^t$                                  | Missingness variable of user $i$ toward item $j$ at time $t$        |
| $S^t$                                            | <i>User intent</i> (state) at time $t$                              |
| $P_{ij}$                                         | User preference of user $i$ toward item $j$                         |
| $\mu_j^t$                                        | Prior probability of $S^t$ for item $j$                             |
| $a^t, b^t$                                       | Beta priors of $S^t$                                                |
| $U_i, V_j$                                       | User-specific and item-specific latent feature factors              |
| $I_K$                                            | The identity matrix of dimension $K$                                |
| $\lambda_u, \lambda_v, \lambda_y$                | Regularization parameters for U, V, Y                               |
| $\lambda_{\text{Inner}}, \lambda_{\text{Outer}}$ | The scale parameters for update of item constraints                 |
| $\sigma_j^{S^t}$                                 | The occurrence probability of item $j$ under $S^t$                  |
| $\omega_j^{S^t}$                                 | The occurrence probability of item $j$ that is “triggered” by $S^t$ |

Table 3: Notation
